# Supplementary material for: Sialic acid and PirB are not required for targeting of neural circuits by neurotropic mammalian orthoreovirus
Source: PubMed Central journal article supplement (PMC11540169; doi:10.1128/msphere.00629-24), 2024-09-25
Supplement: msphere.00629-24-s0001.pdf [file msphere.00629-24-s0001.pdf]

1 **Sialic acid and PirB are not required for viral targeting of**  
2 **neural circuits by neurotropic mammalian orthoreovirus**

3

4 Kira A. Griswold,<sup>1,2</sup> Iaroslavna Vasylieva,<sup>3</sup> Megan C. Smith,<sup>3</sup> Kay L. Fiske,<sup>2,4</sup> Olivia L.  
5 Welsh,<sup>2,4</sup> Alexa N. Roth,<sup>2,4</sup> Alan M. Watson,<sup>3</sup> Simon C. Watkins,<sup>3</sup> Danica M.  
6 Sutherland,<sup>2,4,#</sup> Terence S. Dermody<sup>1,2,4,#</sup>

7

8 <sup>1</sup> Department of Microbiology and Molecular Genetics, University of Pittsburgh School of  
9 Medicine, Pittsburgh, Pennsylvania, USA

10 <sup>2</sup> Institute of Infection, Inflammation, and Immunity, UPMC Children's Hospital of  
11 Pittsburgh, Pittsburgh, Pennsylvania, USA

12 <sup>3</sup> Department of Cell Biology and Center for Biologic Imaging, University of Pittsburgh,  
13 Pittsburgh, Pennsylvania, USA

14 <sup>4</sup> Department of Pediatrics, University of Pittsburgh School of Medicine, Pittsburgh,  
15 Pennsylvania, USA

16

17 Running Head: Reovirus neurotropism in the central nervous system

18

19 # Address correspondence to: Danica M. Sutherland, [danica.sutherland@pitt.edu](mailto:danica.sutherland@pitt.edu), and  
20 Terence S. Dermody, [terence.dermody@chp.edu](mailto:terence.dermody@chp.edu)

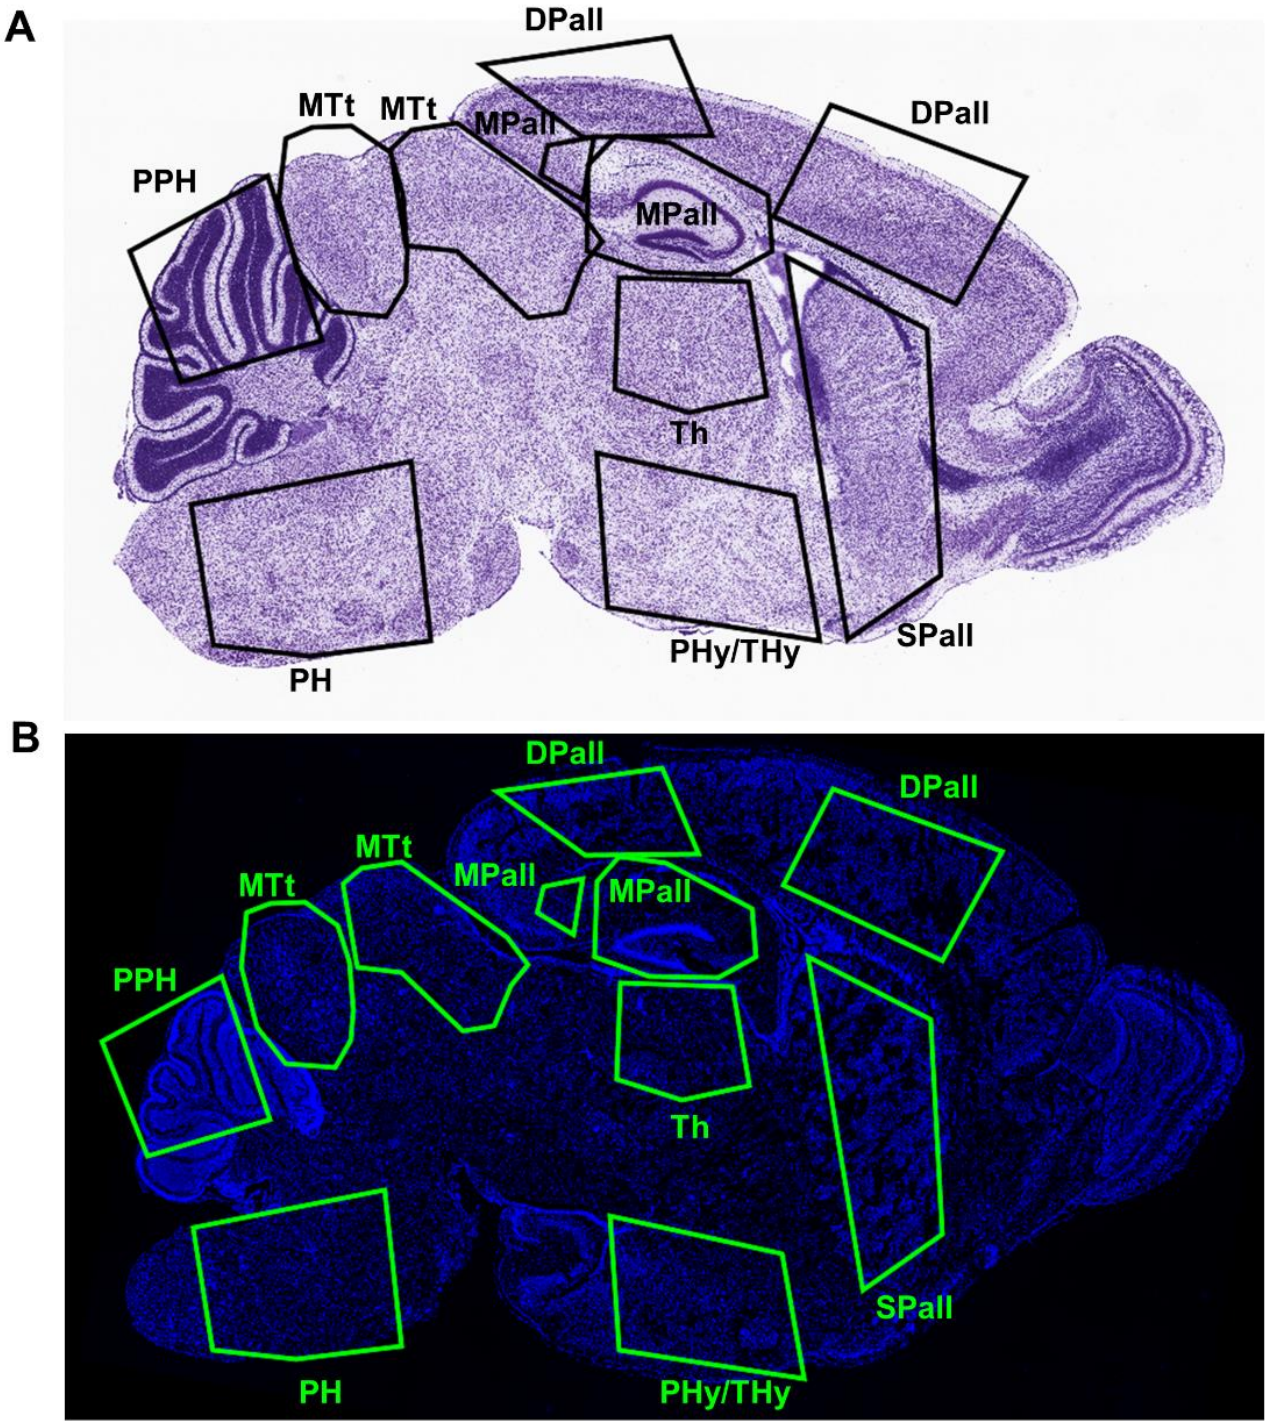

21

22 **FIG S1** Histological mapping approach using a mouse brain atlas to quantify  
 23 **regional relative infection density.** (A) Nissl-stained sagittal brain slice from the Allen  
 24 Developing Mouse Brain Reference Atlas (Allen Developing Mouse Brain Reference

25 Atlas P14, [developingmouse.brain-map.org](http://developingmouse.brain-map.org) and [atlas.brain-map.org/](http://atlas.brain-map.org/)) overlaid with  
26 regions of interest (ROI). Identical ROIs were individually overlaid onto all imaged  
27 sections according to brain landmarks (1,2). **(B)** ROIs (green outlines) overlaid on a  
28 Hoechst-dye-stained brain slice from a mock-infected animal. Brain regions are  
29 indicated. DPall, dorsal pallium; MTt, collicular midbrain tectum; MPall, medial pallium;  
30 PH, pontine hindbrain; PPH, prepontine hindbrain; Th, thalamus; Thy+PHy,  
31 hypothalamus; SPall, subpallium. Some regions (such as DPall, MPall, and MTt) are  
32 quantified from multiple ROIs.

33 **Supplemental Movie S1A. Imaged volume of reovirus-infected brain tissue**  
34 **visualized using MiPACT-HCR.** Two-day-old WT mice were inoculated IC with 1000  
35 PFU T3SA+, and right-brain hemispheres were processed for MiPACT-HCR as  
36 described in FIG 2. Tissue was imaged using MesoSPIM microscopy and processed  
37 into a video using Imaris software (Oxford Instruments). Reovirus RNA is depicted in  
38 green. Movie of sagittal optical sections across entire brain hemisphere. Scale bar, 1000  
39  $\mu\text{m}$ .

40 **Supplemental Movie S1B. Imaged volume of reovirus-infected brain tissue**  
41 **visualized using MiPACT-HCR.** Two-day-old WT mice were inoculated IC with 1000  
42 PFU T3SA+, and right-brain hemispheres were processed for MiPACT-HCR as described  
43 in FIG 2. Tissue was imaged using MesoSPIM microscopy and processed into a video  
44 using Imaris software (Oxford Instruments). Reovirus RNA is depicted in green. Max  
45 projection of z-stacks formatted for movie demonstrating reovirus RNA staining at cell  
46 resolution in 3D. Scale bar, 50  $\mu\text{m}$ .

47 **REFERENCES**

- 48 1. Allen Institute for Brain Science (2013). Allen Developing Mouse Brain Reference  
49 Atlas. Available from [developingmouse.brain-map.org](http://developingmouse.brain-map.org)
- 50 2. Thompson CL, Ng L, Menon V, Martinez S, Lee CK, Glattfelder K, Sunkin SM,  
51 Henry A, Lau C, Dang C, Garcia-Lopez R, Martinez-Ferre A, Pombero A,  
52 Rubenstein JLR, Wakeman WB, Hohmann J, Dee N, Sodt AJ, Young R, Smith K,  
53 Nguyen TN, Kidney J, Kuan L, Jeromin A, Kaykas A, Miller J, Page D, Orta G,  
54 Bernard A, Riley Z, Smith S, Wohnoutka P, Hawrylycz MJ, Puelles L, Jones AR.  
55 2014. A high-resolution spatiotemporal atlas of gene expression of the  
56 developing mouse brain. *Neuron* 83:309-23.

57
